# Supplementary material for: A general ligand design for gold catalysis allowing ligand-directed anti-nucleophilic attack of alkynes
Source: Springer Nature journal article supplement (doi:10.1038/ncomms4470), 2014-04-07
Supplement: 41467_2014_BFncomms4470_MOESM1_ESM.mol [file 41467_2014_BFncomms4470_MOESM1_ESM.mol]

  ChemDraw03051407452D

 41 48  0  0  0  0  0  0  0  0999 V2000
   -2.8542    1.3924    0.0000 C   0  0  0  0  0  0  0  0  0  0  0  0
   -2.8542    0.5674    0.0000 C   0  0  0  0  0  0  0  0  0  0  0  0
   -2.1398    0.1549    0.0000 C   0  0  0  0  0  0  0  0  0  0  0  0
   -1.4253    0.5674    0.0000 C   0  0  0  0  0  0  0  0  0  0  0  0
   -1.4253    1.3924    0.0000 C   0  0  0  0  0  0  0  0  0  0  0  0
   -2.1398    1.8049    0.0000 C   0  0  0  0  0  0  0  0  0  0  0  0
   -2.1398   -0.6673    0.0000 C   0  0  0  0  0  0  0  0  0  0  0  0
   -2.8542   -1.0798    0.0000 C   0  0  0  0  0  0  0  0  0  0  0  0
   -2.8542   -1.9048    0.0000 C   0  0  0  0  0  0  0  0  0  0  0  0
   -2.1398   -2.3173    0.0000 C   0  0  0  0  0  0  0  0  0  0  0  0
   -1.4253   -1.9048    0.0000 C   0  0  0  0  0  0  0  0  0  0  0  0
   -1.4253   -1.0798    0.0000 C   0  0  0  0  0  0  0  0  0  0  0  0
   -0.7133   -2.3158    0.0000 N   0  0  0  0  0  0  0  0  0  0  0  0
   -0.0013   -1.9048    0.0000 C   0  0  0  0  0  0  0  0  0  0  0  0
   -0.7133   -3.1380    0.0000 C   0  0  0  0  0  0  0  0  0  0  0  0
    0.0939    0.7934    0.0000 P   0  0  0  0  0  0  0  0  0  0  0  0
    2.0292    0.1152    0.0000 C   0  0  0  0  0  0  0  0  0  0  0  0
    2.0447   -0.6863    0.0000 C   0  0  0  0  0  0  0  0  0  0  0  0
    1.3637   -1.1092    0.0000 C   0  0  0  0  0  0  0  0  0  0  0  0
    1.3530   -0.2871    0.0000 C   0  0  0  0  0  0  0  0  0  0  0  0
    0.6356    0.1148    0.0000 C   0  0  0  0  0  0  0  0  0  0  0  0
    1.3323    0.5114    0.0000 C   0  0  0  0  0  0  0  0  0  0  0  0
    0.6570   -1.5295    0.0000 C   0  0  0  0  0  0  0  0  0  0  0  0
    1.1872   -0.8472    0.0000 C   0  0  0  0  0  0  0  0  0  0  0  0
   -0.0710   -0.3056    0.0000 C   0  0  0  0  0  0  0  0  0  0  0  0
   -0.0603   -1.1277    0.0000 C   0  0  0  0  0  0  0  0  0  0  0  0
    0.4886    2.8932    0.0000 C   0  0  0  0  0  0  0  0  0  0  0  0
    1.2608    3.1085    0.0000 C   0  0  0  0  0  0  0  0  0  0  0  0
    1.8404    2.5546    0.0000 C   0  0  0  0  0  0  0  0  0  0  0  0
    1.0470    2.3389    0.0000 C   0  0  0  0  0  0  0  0  0  0  0  0
    0.8371    1.5439    0.0000 C   0  0  0  0  0  0  0  0  0  0  0  0
    0.2790    2.1194    0.0000 C   0  0  0  0  0  0  0  0  0  0  0  0
    2.4239    1.9753    0.0000 C   0  0  0  0  0  0  0  0  0  0  0  0
    1.6308    2.3183    0.0000 C   0  0  0  0  0  0  0  0  0  0  0  0
    1.4206    0.9646    0.0000 C   0  0  0  0  0  0  0  0  0  0  0  0
    2.2140    1.1804    0.0000 C   0  0  0  0  0  0  0  0  0  0  0  0
    2.4238    3.1380    0.0000 H   0  0  0  0  0  0  0  0  0  0  0  0
    2.7974    0.5970    0.0000 H   0  0  0  0  0  0  0  0  0  0  0  0
    2.8542    0.1152    0.0000 H   0  0  0  0  0  0  0  0  0  0  0  0
    1.7762   -1.8237    0.0000 H   0  0  0  0  0  0  0  0  0  0  0  0
   -0.7748   -1.5402    0.0000 H   0  0  0  0  0  0  0  0  0  0  0  0
  1  2  2  0      
  2  3  1  0      
  3  4  2  0      
  4  5  1  0      
  5  6  2  0      
  6  1  1  0      
  3  7  1  0      
  7  8  2  0      
  8  9  1  0      
  9 10  2  0      
 10 11  1  0      
 11 12  2  0      
 12  7  1  0      
  4 16  1  0      
 11 13  1  0      
 13 14  1  0      
 13 15  1  0      
 16 21  1  0      
 16 31  1  0      
 17 18  1  0      
 18 19  1  0      
 19 20  1  6      
 21 20  1  6      
 21 22  1  0      
 17 22  1  0      
 19 23  1  0      
 17 24  1  1      
 21 25  1  0      
 23 26  1  0      
 25 26  1  0      
 26 24  1  1      
 27 28  1  0      
 28 29  1  0      
 29 30  1  6      
 31 30  1  6      
 31 32  1  0      
 27 32  1  0      
 29 33  1  0      
 27 34  1  1      
 31 35  1  0      
 33 36  1  0      
 35 36  1  0      
 36 34  1  1      
 29 37  1  0      
 36 38  1  0      
 17 39  1  0      
 19 40  1  0      
 26 41  1  0      
M  END
