# Supplementary material for: A general ligand design for gold catalysis allowing ligand-directed anti-nucleophilic attack of alkynes
Source: Springer Nature journal article supplement (doi:10.1038/ncomms4470), 2014-04-07
Supplement: 41467_2014_BFncomms4470_MOESM3_ESM.mol [file 41467_2014_BFncomms4470_MOESM3_ESM.mol]

  ChemDraw03051407452D

 41 48  0  0  0  0  0  0  0  0999 V2000
   -2.8116    1.5628    0.0000 C   0  0  0  0  0  0  0  0  0  0  0  0
   -2.8116    0.7378    0.0000 C   0  0  0  0  0  0  0  0  0  0  0  0
   -2.0971    0.3253    0.0000 C   0  0  0  0  0  0  0  0  0  0  0  0
   -1.3826    0.7378    0.0000 C   0  0  0  0  0  0  0  0  0  0  0  0
   -1.3826    1.5628    0.0000 C   0  0  0  0  0  0  0  0  0  0  0  0
   -2.0971    1.9753    0.0000 C   0  0  0  0  0  0  0  0  0  0  0  0
   -2.0971   -0.4968    0.0000 C   0  0  0  0  0  0  0  0  0  0  0  0
   -2.8116   -0.9093    0.0000 C   0  0  0  0  0  0  0  0  0  0  0  0
   -2.8116   -1.7343    0.0000 C   0  0  0  0  0  0  0  0  0  0  0  0
   -2.0971   -2.1468    0.0000 C   0  0  0  0  0  0  0  0  0  0  0  0
   -1.3826   -1.7343    0.0000 C   0  0  0  0  0  0  0  0  0  0  0  0
   -1.3826   -0.9093    0.0000 C   0  0  0  0  0  0  0  0  0  0  0  0
   -2.0971   -2.9690    0.0000 N   0  0  0  0  0  0  0  0  0  0  0  0
   -2.8091   -3.3801    0.0000 C   0  0  0  0  0  0  0  0  0  0  0  0
   -1.3851   -3.3801    0.0000 C   0  0  0  0  0  0  0  0  0  0  0  0
    0.0512    1.0354    0.0000 P   0  0  0  0  0  0  0  0  0  0  0  0
    1.9866    0.3573    0.0000 C   0  0  0  0  0  0  0  0  0  0  0  0
    2.0021   -0.4443    0.0000 C   0  0  0  0  0  0  0  0  0  0  0  0
    1.3210   -0.8671    0.0000 C   0  0  0  0  0  0  0  0  0  0  0  0
    1.3103   -0.0450    0.0000 C   0  0  0  0  0  0  0  0  0  0  0  0
    0.5930    0.3569    0.0000 C   0  0  0  0  0  0  0  0  0  0  0  0
    1.2897    0.7535    0.0000 C   0  0  0  0  0  0  0  0  0  0  0  0
    0.6143   -1.2875    0.0000 C   0  0  0  0  0  0  0  0  0  0  0  0
    1.1446   -0.6051    0.0000 C   0  0  0  0  0  0  0  0  0  0  0  0
   -0.1137   -0.0635    0.0000 C   0  0  0  0  0  0  0  0  0  0  0  0
   -0.1030   -0.8856    0.0000 C   0  0  0  0  0  0  0  0  0  0  0  0
    0.4459    3.1353    0.0000 C   0  0  0  0  0  0  0  0  0  0  0  0
    1.2181    3.3505    0.0000 C   0  0  0  0  0  0  0  0  0  0  0  0
    1.7977    2.7967    0.0000 C   0  0  0  0  0  0  0  0  0  0  0  0
    1.0043    2.5810    0.0000 C   0  0  0  0  0  0  0  0  0  0  0  0
    0.7944    1.7860    0.0000 C   0  0  0  0  0  0  0  0  0  0  0  0
    0.2363    2.3615    0.0000 C   0  0  0  0  0  0  0  0  0  0  0  0
    2.3813    2.2174    0.0000 C   0  0  0  0  0  0  0  0  0  0  0  0
    1.5881    2.5604    0.0000 C   0  0  0  0  0  0  0  0  0  0  0  0
    1.3779    1.2067    0.0000 C   0  0  0  0  0  0  0  0  0  0  0  0
    2.1714    1.4224    0.0000 C   0  0  0  0  0  0  0  0  0  0  0  0
    2.3811    3.3801    0.0000 H   0  0  0  0  0  0  0  0  0  0  0  0
    2.7547    0.8391    0.0000 H   0  0  0  0  0  0  0  0  0  0  0  0
    2.8116    0.3573    0.0000 H   0  0  0  0  0  0  0  0  0  0  0  0
    1.7335   -1.5816    0.0000 H   0  0  0  0  0  0  0  0  0  0  0  0
   -0.8175   -1.2981    0.0000 H   0  0  0  0  0  0  0  0  0  0  0  0
  1  2  2  0      
  2  3  1  0      
  3  4  2  0      
  4  5  1  0      
  5  6  2  0      
  6  1  1  0      
  3  7  1  0      
  7  8  2  0      
  8  9  1  0      
  9 10  2  0      
 10 11  1  0      
 11 12  2  0      
 12  7  1  0      
  4 16  1  0      
 10 13  1  0      
 13 14  1  0      
 13 15  1  0      
 16 21  1  0      
 16 31  1  0      
 17 18  1  0      
 18 19  1  0      
 19 20  1  6      
 21 20  1  6      
 21 22  1  0      
 17 22  1  0      
 19 23  1  0      
 17 24  1  1      
 21 25  1  0      
 23 26  1  0      
 25 26  1  0      
 26 24  1  1      
 27 28  1  0      
 28 29  1  0      
 29 30  1  6      
 31 30  1  6      
 31 32  1  0      
 27 32  1  0      
 29 33  1  0      
 27 34  1  1      
 31 35  1  0      
 33 36  1  0      
 35 36  1  0      
 36 34  1  1      
 29 37  1  0      
 36 38  1  0      
 17 39  1  0      
 19 40  1  0      
 26 41  1  0      
M  END
