# Supplementary material for: A general ligand design for gold catalysis allowing ligand-directed anti-nucleophilic attack of alkynes
Source: Springer Nature journal article supplement (doi:10.1038/ncomms4470), 2014-04-07
Supplement: 41467_2014_BFncomms4470_MOESM5_ESM.mol [file 41467_2014_BFncomms4470_MOESM5_ESM.mol]

  ChemDraw03051407452D

 44 52  0  0  0  0  0  0  0  0999 V2000
   -2.8860    2.4095    0.0000 C   0  0  0  0  0  0  0  0  0  0  0  0
   -2.8860    1.5817    0.0000 C   0  0  0  0  0  0  0  0  0  0  0  0
   -2.1691    1.1679    0.0000 C   0  0  0  0  0  0  0  0  0  0  0  0
   -1.4523    1.5817    0.0000 C   0  0  0  0  0  0  0  0  0  0  0  0
   -1.4523    2.4095    0.0000 C   0  0  0  0  0  0  0  0  0  0  0  0
   -2.1691    2.8234    0.0000 C   0  0  0  0  0  0  0  0  0  0  0  0
   -2.1691    0.3429    0.0000 C   0  0  0  0  0  0  0  0  0  0  0  0
   -2.8860   -0.0709    0.0000 C   0  0  0  0  0  0  0  0  0  0  0  0
   -2.8860   -0.8987    0.0000 C   0  0  0  0  0  0  0  0  0  0  0  0
   -2.1691   -1.3126    0.0000 C   0  0  0  0  0  0  0  0  0  0  0  0
   -1.4523   -0.8987    0.0000 C   0  0  0  0  0  0  0  0  0  0  0  0
   -1.4523   -0.0709    0.0000 C   0  0  0  0  0  0  0  0  0  0  0  0
   -2.1691   -2.1375    0.0000 N   0  0  0  0  0  0  0  0  0  0  0  0
   -2.8835   -2.5500    0.0000 C   0  0  0  0  0  0  0  0  0  0  0  0
   -1.4547   -2.5500    0.0000 C   0  0  0  0  0  0  0  0  0  0  0  0
   -2.8835   -3.3749    0.0000 C   0  0  0  0  0  0  0  0  0  0  0  0
   -2.1691   -3.7874    0.0000 O   0  0  0  0  0  0  0  0  0  0  0  0
   -1.4547   -3.3749    0.0000 C   0  0  0  0  0  0  0  0  0  0  0  0
    0.1163    1.4348    0.0000 P   0  0  0  0  0  0  0  0  0  0  0  0
    2.0582    0.7544    0.0000 C   0  0  0  0  0  0  0  0  0  0  0  0
    2.0738   -0.0499    0.0000 C   0  0  0  0  0  0  0  0  0  0  0  0
    1.3904   -0.4742    0.0000 C   0  0  0  0  0  0  0  0  0  0  0  0
    1.3797    0.3508    0.0000 C   0  0  0  0  0  0  0  0  0  0  0  0
    0.6599    0.7540    0.0000 C   0  0  0  0  0  0  0  0  0  0  0  0
    1.3590    1.1519    0.0000 C   0  0  0  0  0  0  0  0  0  0  0  0
    0.6814   -0.8959    0.0000 C   0  0  0  0  0  0  0  0  0  0  0  0
    1.2134   -0.2113    0.0000 C   0  0  0  0  0  0  0  0  0  0  0  0
   -0.0491    0.3322    0.0000 C   0  0  0  0  0  0  0  0  0  0  0  0
   -0.0384   -0.4927    0.0000 C   0  0  0  0  0  0  0  0  0  0  0  0
    0.5124    3.5418    0.0000 C   0  0  0  0  0  0  0  0  0  0  0  0
    1.2872    3.7577    0.0000 C   0  0  0  0  0  0  0  0  0  0  0  0
    1.8687    3.2020    0.0000 C   0  0  0  0  0  0  0  0  0  0  0  0
    1.0726    2.9856    0.0000 C   0  0  0  0  0  0  0  0  0  0  0  0
    0.8620    2.1879    0.0000 C   0  0  0  0  0  0  0  0  0  0  0  0
    0.3021    2.7654    0.0000 C   0  0  0  0  0  0  0  0  0  0  0  0
    2.4542    2.6208    0.0000 C   0  0  0  0  0  0  0  0  0  0  0  0
    1.6584    2.9649    0.0000 C   0  0  0  0  0  0  0  0  0  0  0  0
    1.4475    1.6067    0.0000 C   0  0  0  0  0  0  0  0  0  0  0  0
    2.2436    1.8231    0.0000 C   0  0  0  0  0  0  0  0  0  0  0  0
    2.4541    3.7874    0.0000 H   0  0  0  0  0  0  0  0  0  0  0  0
    2.8290    1.2378    0.0000 H   0  0  0  0  0  0  0  0  0  0  0  0
    2.8860    0.7544    0.0000 H   0  0  0  0  0  0  0  0  0  0  0  0
    1.8043   -1.1910    0.0000 H   0  0  0  0  0  0  0  0  0  0  0  0
   -0.7553   -0.9066    0.0000 H   0  0  0  0  0  0  0  0  0  0  0  0
  1  2  2  0      
  2  3  1  0      
  3  4  2  0      
  4  5  1  0      
  5  6  2  0      
  6  1  1  0      
  3  7  1  0      
  7  8  2  0      
  8  9  1  0      
  9 10  2  0      
 10 11  1  0      
 11 12  2  0      
 12  7  1  0      
  4 19  1  0      
 10 13  1  0      
 13 14  1  0      
 13 15  1  0      
 14 16  1  0      
 16 17  1  0      
 17 18  1  0      
 18 15  1  0      
 19 24  1  0      
 19 34  1  0      
 20 21  1  0      
 21 22  1  0      
 22 23  1  6      
 24 23  1  6      
 24 25  1  0      
 20 25  1  0      
 22 26  1  0      
 20 27  1  1      
 24 28  1  0      
 26 29  1  0      
 28 29  1  0      
 29 27  1  1      
 30 31  1  0      
 31 32  1  0      
 32 33  1  6      
 34 33  1  6      
 34 35  1  0      
 30 35  1  0      
 32 36  1  0      
 30 37  1  1      
 34 38  1  0      
 36 39  1  0      
 38 39  1  0      
 39 37  1  1      
 32 40  1  0      
 39 41  1  0      
 20 42  1  0      
 22 43  1  0      
 29 44  1  0      
M  END
