# Supplementary material for: A general ligand design for gold catalysis allowing ligand-directed anti-nucleophilic attack of alkynes
Source: Springer Nature journal article supplement (doi:10.1038/ncomms4470), 2014-04-07
Supplement: 41467_2014_BFncomms4470_MOESM15_ESM.mol [file 41467_2014_BFncomms4470_MOESM15_ESM.mol]

  ChemDraw03051407452D

 45 53  0  0  0  0  0  0  0  0999 V2000
   -2.8203    1.8910    0.0000 C   0  0  0  0  0  0  0  0  0  0  0  0
   -2.8203    1.0660    0.0000 C   0  0  0  0  0  0  0  0  0  0  0  0
   -2.1059    0.6535    0.0000 C   0  0  0  0  0  0  0  0  0  0  0  0
   -1.3914    1.0660    0.0000 C   0  0  0  0  0  0  0  0  0  0  0  0
   -1.3914    1.8910    0.0000 C   0  0  0  0  0  0  0  0  0  0  0  0
   -2.1059    2.3035    0.0000 C   0  0  0  0  0  0  0  0  0  0  0  0
   -2.1059   -0.1686    0.0000 C   0  0  0  0  0  0  0  0  0  0  0  0
   -2.8203   -0.5811    0.0000 C   0  0  0  0  0  0  0  0  0  0  0  0
   -2.8203   -1.4061    0.0000 C   0  0  0  0  0  0  0  0  0  0  0  0
   -2.1059   -1.8186    0.0000 C   0  0  0  0  0  0  0  0  0  0  0  0
   -1.3914   -1.4061    0.0000 C   0  0  0  0  0  0  0  0  0  0  0  0
   -1.3914   -0.5811    0.0000 C   0  0  0  0  0  0  0  0  0  0  0  0
   -0.6794   -1.8172    0.0000 C   0  0  0  0  0  0  0  0  0  0  0  0
    0.0326   -1.4061    0.0000 O   0  0  0  0  0  0  0  0  0  0  0  0
   -0.6794   -2.6393    0.0000 N   0  0  0  0  0  0  0  0  0  0  0  0
   -1.3469   -3.1242    0.0000 C   0  0  0  0  0  0  0  0  0  0  0  0
   -1.0919   -3.9088    0.0000 C   0  0  0  0  0  0  0  0  0  0  0  0
   -0.2669   -3.9088    0.0000 C   0  0  0  0  0  0  0  0  0  0  0  0
   -0.0120   -3.1242    0.0000 C   0  0  0  0  0  0  0  0  0  0  0  0
    0.0600    1.5642    0.0000 P   0  0  0  0  0  0  0  0  0  0  0  0
    1.9953    0.8860    0.0000 C   0  0  0  0  0  0  0  0  0  0  0  0
    2.0108    0.0845    0.0000 C   0  0  0  0  0  0  0  0  0  0  0  0
    1.3298   -0.3383    0.0000 C   0  0  0  0  0  0  0  0  0  0  0  0
    1.3191    0.4838    0.0000 C   0  0  0  0  0  0  0  0  0  0  0  0
    0.6017    0.8856    0.0000 C   0  0  0  0  0  0  0  0  0  0  0  0
    1.2984    1.2823    0.0000 C   0  0  0  0  0  0  0  0  0  0  0  0
    0.6231   -0.7587    0.0000 C   0  0  0  0  0  0  0  0  0  0  0  0
    1.1533   -0.0763    0.0000 C   0  0  0  0  0  0  0  0  0  0  0  0
   -0.1049    0.4653    0.0000 C   0  0  0  0  0  0  0  0  0  0  0  0
   -0.0942   -0.3568    0.0000 C   0  0  0  0  0  0  0  0  0  0  0  0
    0.4547    3.6641    0.0000 C   0  0  0  0  0  0  0  0  0  0  0  0
    1.2269    3.8793    0.0000 C   0  0  0  0  0  0  0  0  0  0  0  0
    1.8065    3.3255    0.0000 C   0  0  0  0  0  0  0  0  0  0  0  0
    1.0131    3.1098    0.0000 C   0  0  0  0  0  0  0  0  0  0  0  0
    0.8032    2.3148    0.0000 C   0  0  0  0  0  0  0  0  0  0  0  0
    0.2451    2.8903    0.0000 C   0  0  0  0  0  0  0  0  0  0  0  0
    2.3900    2.7462    0.0000 C   0  0  0  0  0  0  0  0  0  0  0  0
    1.5969    3.0892    0.0000 C   0  0  0  0  0  0  0  0  0  0  0  0
    1.3867    1.7355    0.0000 C   0  0  0  0  0  0  0  0  0  0  0  0
    2.1801    1.9512    0.0000 C   0  0  0  0  0  0  0  0  0  0  0  0
    2.3899    3.9088    0.0000 H   0  0  0  0  0  0  0  0  0  0  0  0
    2.7635    1.3679    0.0000 H   0  0  0  0  0  0  0  0  0  0  0  0
    2.8203    0.8860    0.0000 H   0  0  0  0  0  0  0  0  0  0  0  0
    1.7423   -1.0528    0.0000 H   0  0  0  0  0  0  0  0  0  0  0  0
   -0.8087   -0.7693    0.0000 H   0  0  0  0  0  0  0  0  0  0  0  0
  1  2  2  0      
  2  3  1  0      
  3  4  2  0      
  4  5  1  0      
  5  6  2  0      
  6  1  1  0      
  3  7  1  0      
  7  8  2  0      
  8  9  1  0      
  9 10  2  0      
 10 11  1  0      
 11 12  2  0      
 12  7  1  0      
  4 20  1  0      
 11 13  1  0      
 13 14  2  0      
 13 15  1  0      
 15 16  1  0      
 16 17  1  0      
 17 18  1  0      
 18 19  1  0      
 19 15  1  0      
 20 25  1  0      
 20 35  1  0      
 21 22  1  0      
 22 23  1  0      
 23 24  1  6      
 25 24  1  6      
 25 26  1  0      
 21 26  1  0      
 23 27  1  0      
 21 28  1  1      
 25 29  1  0      
 27 30  1  0      
 29 30  1  0      
 30 28  1  1      
 31 32  1  0      
 32 33  1  0      
 33 34  1  6      
 35 34  1  6      
 35 36  1  0      
 31 36  1  0      
 33 37  1  0      
 31 38  1  1      
 35 39  1  0      
 37 40  1  0      
 39 40  1  0      
 40 38  1  1      
 33 41  1  0      
 40 42  1  0      
 21 43  1  0      
 23 44  1  0      
 30 45  1  0      
M  END
