# Supplementary material for: A general ligand design for gold catalysis allowing ligand-directed anti-nucleophilic attack of alkynes
Source: Springer Nature journal article supplement (doi:10.1038/ncomms4470), 2014-04-07
Supplement: 41467_2014_BFncomms4470_MOESM29_ESM.mol [file 41467_2014_BFncomms4470_MOESM29_ESM.mol]

  ChemDraw03051407452D

 48 54  0  0  0  0  0  0  0  0999 V2000
   -3.4811    2.0669    0.0000 C   0  0  0  0  0  0  0  0  0  0  0  0
   -3.4811    1.2419    0.0000 C   0  0  0  0  0  0  0  0  0  0  0  0
   -2.7666    0.8294    0.0000 C   0  0  0  0  0  0  0  0  0  0  0  0
   -2.0522    1.2419    0.0000 C   0  0  0  0  0  0  0  0  0  0  0  0
   -2.0522    2.0669    0.0000 C   0  0  0  0  0  0  0  0  0  0  0  0
   -2.7666    2.4794    0.0000 C   0  0  0  0  0  0  0  0  0  0  0  0
   -2.7666    0.0073    0.0000 C   0  0  0  0  0  0  0  0  0  0  0  0
   -3.4811   -0.4052    0.0000 C   0  0  0  0  0  0  0  0  0  0  0  0
   -3.4811   -1.2302    0.0000 C   0  0  0  0  0  0  0  0  0  0  0  0
   -2.7666   -1.6427    0.0000 C   0  0  0  0  0  0  0  0  0  0  0  0
   -2.0522   -1.2302    0.0000 C   0  0  0  0  0  0  0  0  0  0  0  0
   -2.0522   -0.4052    0.0000 C   0  0  0  0  0  0  0  0  0  0  0  0
   -1.3402   -1.6413    0.0000 C   0  0  0  0  0  0  0  0  0  0  0  0
   -0.6282   -1.2302    0.0000 O   0  0  0  0  0  0  0  0  0  0  0  0
   -1.3402   -2.4634    0.0000 N   0  0  0  0  0  0  0  0  0  0  0  0
   -2.0546   -2.8759    0.0000 C   0  0  0  0  0  0  0  0  0  0  0  0
   -2.0546   -3.7009    0.0000 C   0  0  0  0  0  0  0  0  0  0  0  0
   -1.3402   -4.1134    0.0000 C   0  0  0  0  0  0  0  0  0  0  0  0
   -0.6257   -3.7009    0.0000 C   0  0  0  0  0  0  0  0  0  0  0  0
   -0.6257   -2.8759    0.0000 C   0  0  0  0  0  0  0  0  0  0  0  0
   -0.6873    1.7688    0.0000 P   0  0  0  0  0  0  0  0  0  0  0  0
    1.2481    1.0906    0.0000 C   0  0  0  0  0  0  0  0  0  0  0  0
    1.2636    0.2891    0.0000 C   0  0  0  0  0  0  0  0  0  0  0  0
    0.5825   -0.1338    0.0000 C   0  0  0  0  0  0  0  0  0  0  0  0
    0.5718    0.6884    0.0000 C   0  0  0  0  0  0  0  0  0  0  0  0
   -0.1455    1.0902    0.0000 C   0  0  0  0  0  0  0  0  0  0  0  0
    0.5512    1.4868    0.0000 C   0  0  0  0  0  0  0  0  0  0  0  0
   -0.1242   -0.5541    0.0000 C   0  0  0  0  0  0  0  0  0  0  0  0
    0.4061    0.1282    0.0000 C   0  0  0  0  0  0  0  0  0  0  0  0
   -0.8522    0.6699    0.0000 C   0  0  0  0  0  0  0  0  0  0  0  0
   -0.8415   -0.1523    0.0000 C   0  0  0  0  0  0  0  0  0  0  0  0
   -0.2926    3.8687    0.0000 C   0  0  0  0  0  0  0  0  0  0  0  0
    0.4796    4.0839    0.0000 C   0  0  0  0  0  0  0  0  0  0  0  0
    1.0592    3.5300    0.0000 C   0  0  0  0  0  0  0  0  0  0  0  0
    0.2658    3.3143    0.0000 C   0  0  0  0  0  0  0  0  0  0  0  0
    0.0559    2.5193    0.0000 C   0  0  0  0  0  0  0  0  0  0  0  0
   -0.5022    3.0949    0.0000 C   0  0  0  0  0  0  0  0  0  0  0  0
    1.6427    2.9508    0.0000 C   0  0  0  0  0  0  0  0  0  0  0  0
    0.8496    3.2937    0.0000 C   0  0  0  0  0  0  0  0  0  0  0  0
    0.6394    1.9401    0.0000 C   0  0  0  0  0  0  0  0  0  0  0  0
    1.4328    2.1558    0.0000 C   0  0  0  0  0  0  0  0  0  0  0  0
    1.6426    4.1134    0.0000 H   0  0  0  0  0  0  0  0  0  0  0  0
    2.0162    1.5724    0.0000 H   0  0  0  0  0  0  0  0  0  0  0  0
    2.0731    1.0906    0.0000 H   0  0  0  0  0  0  0  0  0  0  0  0
    0.9950   -0.8483    0.0000 H   0  0  0  0  0  0  0  0  0  0  0  0
   -1.5560   -0.5648    0.0000 H   0  0  0  0  0  0  0  0  0  0  0  0
    2.9977    1.1457    0.0000 Au  0  3  0  0  0  0  0  0  0  0  0  0
    3.4811   -0.1836    0.0000 Cl  0  5  0  0  0  0  0  0  0  0  0  0
  1  2  2  0      
  2  3  1  0      
  3  4  2  0      
  4  5  1  0      
  5  6  2  0      
  6  1  1  0      
  3  7  1  0      
  7  8  2  0      
  8  9  1  0      
  9 10  2  0      
 10 11  1  0      
 11 12  2  0      
 12  7  1  0      
  4 21  1  0      
 11 13  1  0      
 13 14  2  0      
 13 15  1  0      
 15 16  1  0      
 16 17  1  0      
 17 18  1  0      
 18 19  1  0      
 19 20  1  0      
 20 15  1  0      
 21 26  1  0      
 21 36  1  0      
 22 23  1  0      
 23 24  1  0      
 24 25  1  6      
 26 25  1  6      
 26 27  1  0      
 22 27  1  0      
 24 28  1  0      
 22 29  1  1      
 26 30  1  0      
 28 31  1  0      
 30 31  1  0      
 31 29  1  1      
 32 33  1  0      
 33 34  1  0      
 34 35  1  6      
 36 35  1  6      
 36 37  1  0      
 32 37  1  0      
 34 38  1  0      
 32 39  1  1      
 36 40  1  0      
 38 41  1  0      
 40 41  1  0      
 41 39  1  1      
 34 42  1  0      
 41 43  1  0      
 22 44  1  0      
 24 45  1  0      
 31 46  1  0      
M  CHG  2  47   1  48  -1
M  END
