# Supplementary material for: A general ligand design for gold catalysis allowing ligand-directed anti-nucleophilic attack of alkynes
Source: Springer Nature journal article supplement (doi:10.1038/ncomms4470), 2014-04-07
Supplement: 41467_2014_BFncomms4470_MOESM31_ESM.mol [file 41467_2014_BFncomms4470_MOESM31_ESM.mol]

  ChemDraw03051407452D

 47 53  0  0  0  0  0  0  0  0999 V2000
   -3.3990    1.9483    0.0000 C   0  0  0  0  0  0  0  0  0  0  0  0
   -3.3990    1.1233    0.0000 C   0  0  0  0  0  0  0  0  0  0  0  0
   -2.6846    0.7108    0.0000 C   0  0  0  0  0  0  0  0  0  0  0  0
   -1.9701    1.1233    0.0000 C   0  0  0  0  0  0  0  0  0  0  0  0
   -1.9701    1.9483    0.0000 C   0  0  0  0  0  0  0  0  0  0  0  0
   -2.6846    2.3608    0.0000 C   0  0  0  0  0  0  0  0  0  0  0  0
   -2.6846   -0.1113    0.0000 C   0  0  0  0  0  0  0  0  0  0  0  0
   -3.3990   -0.5238    0.0000 C   0  0  0  0  0  0  0  0  0  0  0  0
   -3.3990   -1.3488    0.0000 C   0  0  0  0  0  0  0  0  0  0  0  0
   -2.6846   -1.7613    0.0000 C   0  0  0  0  0  0  0  0  0  0  0  0
   -1.9701   -1.3488    0.0000 C   0  0  0  0  0  0  0  0  0  0  0  0
   -1.9701   -0.5238    0.0000 C   0  0  0  0  0  0  0  0  0  0  0  0
   -1.2581   -1.7599    0.0000 C   0  0  0  0  0  0  0  0  0  0  0  0
   -0.5461   -1.3488    0.0000 O   0  0  0  0  0  0  0  0  0  0  0  0
   -1.2581   -2.5820    0.0000 N   0  0  0  0  0  0  0  0  0  0  0  0
   -1.9255   -3.0669    0.0000 C   0  0  0  0  0  0  0  0  0  0  0  0
   -1.6706   -3.8515    0.0000 C   0  0  0  0  0  0  0  0  0  0  0  0
   -0.8456   -3.8515    0.0000 C   0  0  0  0  0  0  0  0  0  0  0  0
   -0.5907   -3.0669    0.0000 C   0  0  0  0  0  0  0  0  0  0  0  0
   -0.6763    1.5069    0.0000 P   0  0  0  0  0  0  0  0  0  0  0  0
    1.2591    0.8288    0.0000 C   0  0  0  0  0  0  0  0  0  0  0  0
    1.2746    0.0272    0.0000 C   0  0  0  0  0  0  0  0  0  0  0  0
    0.5935   -0.3956    0.0000 C   0  0  0  0  0  0  0  0  0  0  0  0
    0.5828    0.4265    0.0000 C   0  0  0  0  0  0  0  0  0  0  0  0
   -0.1345    0.8284    0.0000 C   0  0  0  0  0  0  0  0  0  0  0  0
    0.5622    1.2250    0.0000 C   0  0  0  0  0  0  0  0  0  0  0  0
   -0.1131   -0.8160    0.0000 C   0  0  0  0  0  0  0  0  0  0  0  0
    0.4171   -0.1336    0.0000 C   0  0  0  0  0  0  0  0  0  0  0  0
   -0.8412    0.4080    0.0000 C   0  0  0  0  0  0  0  0  0  0  0  0
   -0.8305   -0.4141    0.0000 C   0  0  0  0  0  0  0  0  0  0  0  0
   -0.2816    3.6068    0.0000 C   0  0  0  0  0  0  0  0  0  0  0  0
    0.4907    3.8220    0.0000 C   0  0  0  0  0  0  0  0  0  0  0  0
    1.0702    3.2682    0.0000 C   0  0  0  0  0  0  0  0  0  0  0  0
    0.2768    3.0525    0.0000 C   0  0  0  0  0  0  0  0  0  0  0  0
    0.0669    2.2575    0.0000 C   0  0  0  0  0  0  0  0  0  0  0  0
   -0.4912    2.8330    0.0000 C   0  0  0  0  0  0  0  0  0  0  0  0
    1.6538    2.6889    0.0000 C   0  0  0  0  0  0  0  0  0  0  0  0
    0.8606    3.0319    0.0000 C   0  0  0  0  0  0  0  0  0  0  0  0
    0.6504    1.6782    0.0000 C   0  0  0  0  0  0  0  0  0  0  0  0
    1.4439    1.8939    0.0000 C   0  0  0  0  0  0  0  0  0  0  0  0
    1.6536    3.8515    0.0000 H   0  0  0  0  0  0  0  0  0  0  0  0
    2.0272    1.3106    0.0000 H   0  0  0  0  0  0  0  0  0  0  0  0
    2.0841    0.8288    0.0000 H   0  0  0  0  0  0  0  0  0  0  0  0
    1.0060   -1.1101    0.0000 H   0  0  0  0  0  0  0  0  0  0  0  0
   -1.5450   -0.8266    0.0000 H   0  0  0  0  0  0  0  0  0  0  0  0
    2.7867    1.5427    0.0000 Au  0  3  0  0  0  0  0  0  0  0  0  0
    3.3990    0.2564    0.0000 Cl  0  5  0  0  0  0  0  0  0  0  0  0
  1  2  2  0      
  2  3  1  0      
  3  4  2  0      
  4  5  1  0      
  5  6  2  0      
  6  1  1  0      
  3  7  1  0      
  7  8  2  0      
  8  9  1  0      
  9 10  2  0      
 10 11  1  0      
 11 12  2  0      
 12  7  1  0      
  4 20  1  0      
 11 13  1  0      
 13 14  2  0      
 13 15  1  0      
 15 16  1  0      
 16 17  1  0      
 17 18  1  0      
 18 19  1  0      
 19 15  1  0      
 20 25  1  0      
 20 35  1  0      
 21 22  1  0      
 22 23  1  0      
 23 24  1  6      
 25 24  1  6      
 25 26  1  0      
 21 26  1  0      
 23 27  1  0      
 21 28  1  1      
 25 29  1  0      
 27 30  1  0      
 29 30  1  0      
 30 28  1  1      
 31 32  1  0      
 32 33  1  0      
 33 34  1  6      
 35 34  1  6      
 35 36  1  0      
 31 36  1  0      
 33 37  1  0      
 31 38  1  1      
 35 39  1  0      
 37 40  1  0      
 39 40  1  0      
 40 38  1  1      
 33 41  1  0      
 40 42  1  0      
 21 43  1  0      
 23 44  1  0      
 30 45  1  0      
M  CHG  2  46   1  47  -1
M  END
