# Supplementary material for: A general ligand design for gold catalysis allowing ligand-directed anti-nucleophilic attack of alkynes
Source: Springer Nature journal article supplement (doi:10.1038/ncomms4470), 2014-04-07
Supplement: 41467_2014_BFncomms4470_MOESM35_ESM.mol [file 41467_2014_BFncomms4470_MOESM35_ESM.mol]

  ChemDraw03051407452D

 21 21  0  0  0  0  0  0  0  0999 V2000
   -2.1410   -0.2056    0.0000 C   0  0  0  0  0  0  0  0  0  0  0  0
   -1.4265    0.2069    0.0000 C   0  0  0  0  0  0  0  0  0  0  0  0
   -1.4265    1.0292    0.0000 O   0  0  0  0  0  0  0  0  0  0  0  0
   -0.7145   -0.2042    0.0000 O   0  0  0  0  0  0  0  0  0  0  0  0
   -2.8555    0.2069    0.0000 C   0  0  0  0  0  0  0  0  0  0  0  0
   -3.5700   -0.2056    0.0000 C   0  0  0  0  0  0  0  0  0  0  0  0
   -3.5700   -1.0306    0.0000 C   0  0  0  0  0  0  0  0  0  0  0  0
   -2.8555   -1.4431    0.0000 C   0  0  0  0  0  0  0  0  0  0  0  0
   -2.1410   -1.0306    0.0000 C   0  0  0  0  0  0  0  0  0  0  0  0
    0.0000    0.2083    0.0000 C   0  0  0  0  0  0  0  0  0  0  0  0
    0.0000    1.0306    0.0000 C   0  0  0  0  0  0  0  0  0  0  0  0
    0.7121   -0.2028    0.0000 C   0  0  0  0  0  0  0  0  0  0  0  0
    0.7121   -1.0278    0.0000 C   0  0  0  0  0  0  0  0  0  0  0  0
    1.4265   -1.4403    0.0000 C   0  0  0  0  0  0  0  0  0  0  0  0
    2.1410   -1.0278    0.0000 C   0  0  0  0  0  0  0  0  0  0  0  0
    2.8555   -1.4403    0.0000 C   0  0  0  0  0  0  0  0  0  0  0  0
    3.5700   -1.0278    0.0000 C   0  0  0  0  0  0  0  0  0  0  0  0
    0.7145    1.4431    0.0000 C   0  0  0  0  0  0  0  0  0  0  0  0
    1.4289    1.0306    0.0000 C   0  0  0  0  0  0  0  0  0  0  0  0
    2.1434    1.4431    0.0000 C   0  0  0  0  0  0  0  0  0  0  0  0
    2.8579    1.0306    0.0000 C   0  0  0  0  0  0  0  0  0  0  0  0
  1  2  1  0      
  2  3  2  0      
  2  4  1  0      
  1  5  2  0      
  5  6  1  0      
  6  7  2  0      
  7  8  1  0      
  8  9  2  0      
  9  1  1  0      
  4 10  1  0      
 10 11  1  0      
 10 12  2  0      
 12 13  1  0      
 13 14  1  0      
 14 15  1  0      
 15 16  1  0      
 16 17  1  0      
 11 18  1  0      
 18 19  1  0      
 19 20  1  0      
 20 21  1  0      
M  END
