# Supplementary material for: A general ligand design for gold catalysis allowing ligand-directed anti-nucleophilic attack of alkynes
Source: Springer Nature journal article supplement (doi:10.1038/ncomms4470), 2014-04-07
Supplement: 41467_2014_BFncomms4470_MOESM37_ESM.mol [file 41467_2014_BFncomms4470_MOESM37_ESM.mol]

  ChemDraw03051407452D

 22 23  0  0  0  0  0  0  0  0999 V2000
   -2.5986   -0.1732    0.0000 C   0  0  0  0  0  0  0  0  0  0  0  0
   -1.8801    0.2416    0.0000 C   0  0  0  0  0  0  0  0  0  0  0  0
   -1.1615   -0.1732    0.0000 O   0  0  0  0  0  0  0  0  0  0  0  0
   -1.8801    1.0713    0.0000 O   0  0  0  0  0  0  0  0  0  0  0  0
   -0.4430    0.2416    0.0000 C   0  0  0  0  0  0  0  0  0  0  0  0
    0.2755   -0.1732    0.0000 C   0  0  0  0  0  0  0  0  0  0  0  0
   -0.4430    1.0713    0.0000 C   0  0  0  0  0  0  0  0  0  0  0  0
    0.2755   -1.0029    0.0000 C   0  0  0  0  0  0  0  0  0  0  0  0
    1.0810   -1.4679    0.0000 C   0  0  0  0  0  0  0  0  0  0  0  0
    1.8865   -1.0029    0.0000 O   0  0  0  0  0  0  0  0  0  0  0  0
    1.8865   -0.1807    0.0000 C   0  0  0  0  0  0  0  0  0  0  0  0
    2.5986    0.2304    0.0000 C   0  0  0  0  0  0  0  0  0  0  0  0
    3.3130   -0.1821    0.0000 C   0  0  0  0  0  0  0  0  0  0  0  0
    4.0275    0.2304    0.0000 C   0  0  0  0  0  0  0  0  0  0  0  0
    4.0275    1.0554    0.0000 C   0  0  0  0  0  0  0  0  0  0  0  0
    3.3130    1.4679    0.0000 C   0  0  0  0  0  0  0  0  0  0  0  0
    2.5986    1.0554    0.0000 C   0  0  0  0  0  0  0  0  0  0  0  0
   -3.3130    0.2393    0.0000 C   0  0  0  0  0  0  0  0  0  0  0  0
   -4.0275   -0.1732    0.0000 C   0  0  0  0  0  0  0  0  0  0  0  0
   -4.0275   -0.9982    0.0000 C   0  0  0  0  0  0  0  0  0  0  0  0
   -3.3130   -1.4107    0.0000 C   0  0  0  0  0  0  0  0  0  0  0  0
   -2.5986   -0.9982    0.0000 C   0  0  0  0  0  0  0  0  0  0  0  0
  1  2  1  0      
  2  3  1  0      
  2  4  2  0      
  3  5  1  0      
  5  6  2  0      
  5  7  1  0      
  6  8  1  0      
  8  9  1  0      
  9 10  1  0      
 10 11  1  0      
 11 12  1  0      
 12 13  2  0      
 13 14  1  0      
 14 15  2  0      
 15 16  1  0      
 16 17  2  0      
 17 12  1  0      
  1 18  2  0      
 18 19  1  0      
 19 20  2  0      
 20 21  1  0      
 21 22  2  0      
 22  1  1  0      
M  END
