# Supplementary material for: A general ligand design for gold catalysis allowing ligand-directed anti-nucleophilic attack of alkynes
Source: Springer Nature journal article supplement (doi:10.1038/ncomms4470), 2014-04-07
Supplement: 41467_2014_BFncomms4470_MOESM47_ESM.mol [file 41467_2014_BFncomms4470_MOESM47_ESM.mol]

  ChemDraw03051407452D

 16 16  0  0  0  0  0  0  0  0999 V2000
   -1.4265    1.1625    0.0000 C   0  0  0  0  0  0  0  0  0  0  0  0
   -1.4265    0.3375    0.0000 C   0  0  0  0  0  0  0  0  0  0  0  0
   -0.7120   -0.0750    0.0000 C   0  0  0  0  0  0  0  0  0  0  0  0
    0.0025    0.3375    0.0000 C   0  0  0  0  0  0  0  0  0  0  0  0
    0.0025    1.1625    0.0000 C   0  0  0  0  0  0  0  0  0  0  0  0
   -0.7120    1.5750    0.0000 C   0  0  0  0  0  0  0  0  0  0  0  0
    0.7145    1.5736    0.0000 C   0  0  0  0  0  0  0  0  0  0  0  0
    1.4265    1.1625    0.0000 O   0  0  0  0  0  0  0  0  0  0  0  0
    0.7145    2.3957    0.0000 O   0  0  0  0  0  0  0  0  0  0  0  0
    1.4265    0.3404    0.0000 C   0  0  0  0  0  0  0  0  0  0  0  0
    2.1385   -0.0707    0.0000 C   0  0  0  0  0  0  0  0  0  0  0  0
   -2.1385    1.5736    0.0000 Br  0  0  0  0  0  0  0  0  0  0  0  0
   -0.0910   -2.3957    0.0000 C   0  0  0  0  0  0  0  0  0  0  0  0
   -0.0910   -1.4657    0.0000 C   0  0  0  0  0  0  0  0  0  0  0  0
    0.7145   -1.0007    0.0000 C   0  0  0  0  0  0  0  0  0  0  0  0
    0.7145   -0.0707    0.0000 C   0  0  0  0  0  0  0  0  0  0  0  0
  1  2  2  0      
  2  3  1  0      
  3  4  2  0      
  4  5  1  0      
  5  6  2  0      
  6  1  1  0      
  5  7  1  0      
  7  8  1  0      
  7  9  2  0      
  8 10  1  0      
 10 16  1  0      
 10 11  2  0      
  1 12  1  0      
 13 14  1  0      
 14 15  1  0      
 15 16  1  0      
M  END
