# Supplementary material for: A general ligand design for gold catalysis allowing ligand-directed anti-nucleophilic attack of alkynes
Source: Springer Nature journal article supplement (doi:10.1038/ncomms4470), 2014-04-07
Supplement: 41467_2014_BFncomms4470_MOESM51_ESM.mol [file 41467_2014_BFncomms4470_MOESM51_ESM.mol]

  ChemDraw03051407452D

 17 17  0  0  0  0  0  0  0  0999 V2000
   -2.1385   -0.9279    0.0000 C   0  0  0  0  0  0  0  0  0  0  0  0
   -2.1385   -1.7529    0.0000 C   0  0  0  0  0  0  0  0  0  0  0  0
   -1.4240   -2.1654    0.0000 C   0  0  0  0  0  0  0  0  0  0  0  0
   -0.7095   -1.7529    0.0000 C   0  0  0  0  0  0  0  0  0  0  0  0
   -0.7095   -0.9279    0.0000 C   0  0  0  0  0  0  0  0  0  0  0  0
   -1.4240   -0.5154    0.0000 C   0  0  0  0  0  0  0  0  0  0  0  0
    0.0025   -0.5168    0.0000 C   0  0  0  0  0  0  0  0  0  0  0  0
    0.7145   -0.9279    0.0000 O   0  0  0  0  0  0  0  0  0  0  0  0
    0.0025    0.3053    0.0000 O   0  0  0  0  0  0  0  0  0  0  0  0
   -1.4240    0.3068    0.0000 Cl  0  0  0  0  0  0  0  0  0  0  0  0
    0.0025   -2.1639    0.0000 Cl  0  0  0  0  0  0  0  0  0  0  0  0
    1.4265   -0.5168    0.0000 C   0  0  0  0  0  0  0  0  0  0  0  0
    2.1385   -0.9279    0.0000 C   0  0  0  0  0  0  0  0  0  0  0  0
   -0.1844    2.1654    0.0000 C   0  0  0  0  0  0  0  0  0  0  0  0
    0.6210    1.7004    0.0000 C   0  0  0  0  0  0  0  0  0  0  0  0
    0.6210    0.7703    0.0000 C   0  0  0  0  0  0  0  0  0  0  0  0
    1.4265    0.3053    0.0000 C   0  0  0  0  0  0  0  0  0  0  0  0
  1  2  2  0      
  2  3  1  0      
  3  4  2  0      
  4  5  1  0      
  5  6  2  0      
  6  1  1  0      
  5  7  1  0      
  7  8  1  0      
  7  9  2  0      
  6 10  1  0      
  4 11  1  0      
  8 12  1  0      
 12 13  2  0      
 12 17  1  0      
 14 15  1  0      
 15 16  1  0      
 16 17  1  0      
M  END
