# Supplementary material for: A general ligand design for gold catalysis allowing ligand-directed anti-nucleophilic attack of alkynes
Source: Springer Nature journal article supplement (doi:10.1038/ncomms4470), 2014-04-07
Supplement: 41467_2014_BFncomms4470_MOESM53_ESM.mol [file 41467_2014_BFncomms4470_MOESM53_ESM.mol]

  ChemDraw03051407452D

 24 25  0  0  0  0  0  0  0  0999 V2000
   -0.4453    0.6961    0.0000 C   0  0  0  0  0  0  0  0  0  0  0  0
   -0.4453   -0.1290    0.0000 C   0  0  0  0  0  0  0  0  0  0  0  0
    0.2692   -0.5415    0.0000 C   0  0  0  0  0  0  0  0  0  0  0  0
    0.9838   -0.1290    0.0000 C   0  0  0  0  0  0  0  0  0  0  0  0
    0.9838    0.6961    0.0000 C   0  0  0  0  0  0  0  0  0  0  0  0
    0.2692    1.1087    0.0000 C   0  0  0  0  0  0  0  0  0  0  0  0
    1.6958    1.1072    0.0000 C   0  0  0  0  0  0  0  0  0  0  0  0
    2.4079    0.6961    0.0000 O   0  0  0  0  0  0  0  0  0  0  0  0
    1.6958    1.9294    0.0000 O   0  0  0  0  0  0  0  0  0  0  0  0
    2.4079   -0.1261    0.0000 C   0  0  0  0  0  0  0  0  0  0  0  0
    3.1200   -0.5372    0.0000 C   0  0  0  0  0  0  0  0  0  0  0  0
   -1.0631    1.0528    0.0000 B   0  0  0  0  0  0  0  0  0  0  0  0
    0.8903   -2.8625    0.0000 C   0  0  0  0  0  0  0  0  0  0  0  0
    0.8903   -1.9324    0.0000 C   0  0  0  0  0  0  0  0  0  0  0  0
    1.6958   -1.4673    0.0000 C   0  0  0  0  0  0  0  0  0  0  0  0
    1.6958   -0.5372    0.0000 C   0  0  0  0  0  0  0  0  0  0  0  0
   -1.1494    1.8733    0.0000 O   0  0  0  0  0  0  0  0  0  0  0  0
   -1.9563    2.0448    0.0000 C   0  0  0  0  0  0  0  0  0  0  0  0
   -2.3688    1.3303    0.0000 C   0  0  0  0  0  0  0  0  0  0  0  0
   -1.8168    0.7172    0.0000 O   0  0  0  0  0  0  0  0  0  0  0  0
   -3.1200    1.6648    0.0000 C   0  0  0  0  0  0  0  0  0  0  0  0
   -3.0340    0.8470    0.0000 C   0  0  0  0  0  0  0  0  0  0  0  0
   -1.8704    2.8625    0.0000 C   0  0  0  0  0  0  0  0  0  0  0  0
   -2.6215    2.5281    0.0000 C   0  0  0  0  0  0  0  0  0  0  0  0
  1  2  2  0      
  2  3  1  0      
  3  4  2  0      
  4  5  1  0      
  5  6  2  0      
  6  1  1  0      
  5  7  1  0      
  7  8  1  0      
  7  9  2  0      
  8 10  1  0      
 10 16  1  0      
 10 11  2  0      
  1 12  1  0      
 13 14  1  0      
 14 15  1  0      
 15 16  1  0      
 12 17  1  0      
 17 18  1  0      
 18 19  1  0      
 19 20  1  0      
 20 12  1  0      
 19 21  1  0      
 19 22  1  0      
 18 23  1  0      
 18 24  1  0      
M  END
