# Supplementary material for: A general ligand design for gold catalysis allowing ligand-directed anti-nucleophilic attack of alkynes
Source: Springer Nature journal article supplement (doi:10.1038/ncomms4470), 2014-04-07
Supplement: 41467_2014_BFncomms4470_MOESM55_ESM.mol [file 41467_2014_BFncomms4470_MOESM55_ESM.mol]

  ChemDraw03051407452D

 14 14  0  0  0  0  0  0  0  0999 V2000
   -0.4151    1.1625    0.0000 C   0  0  0  0  0  0  0  0  0  0  0  0
    0.2969    1.5736    0.0000 C   0  0  0  0  0  0  0  0  0  0  0  0
    1.0089    1.1625    0.0000 O   0  0  0  0  0  0  0  0  0  0  0  0
    0.2969    2.3957    0.0000 O   0  0  0  0  0  0  0  0  0  0  0  0
    1.0089    0.3404    0.0000 C   0  0  0  0  0  0  0  0  0  0  0  0
    1.7208   -0.0707    0.0000 C   0  0  0  0  0  0  0  0  0  0  0  0
   -1.1688    1.4981    0.0000 S   0  0  0  0  0  0  0  0  0  0  0  0
   -1.7208    0.8850    0.0000 C   0  0  0  0  0  0  0  0  0  0  0  0
   -1.3083    0.1705    0.0000 C   0  0  0  0  0  0  0  0  0  0  0  0
   -0.5014    0.3420    0.0000 C   0  0  0  0  0  0  0  0  0  0  0  0
   -0.5086   -2.3957    0.0000 C   0  0  0  0  0  0  0  0  0  0  0  0
   -0.5086   -1.4657    0.0000 C   0  0  0  0  0  0  0  0  0  0  0  0
    0.2969   -1.0007    0.0000 C   0  0  0  0  0  0  0  0  0  0  0  0
    0.2969   -0.0707    0.0000 C   0  0  0  0  0  0  0  0  0  0  0  0
  1  2  1  0      
  2  3  1  0      
  2  4  2  0      
  3  5  1  0      
  5 14  1  0      
  5  6  2  0      
  1  7  1  0      
  7  8  1  0      
  8  9  2  0      
  9 10  1  0      
 10  1  2  0      
 11 12  1  0      
 12 13  1  0      
 13 14  1  0      
M  END
