# Supplementary material for: A general ligand design for gold catalysis allowing ligand-directed anti-nucleophilic attack of alkynes
Source: Springer Nature journal article supplement (doi:10.1038/ncomms4470), 2014-04-07
Supplement: 41467_2014_BFncomms4470_MOESM65_ESM.mol [file 41467_2014_BFncomms4470_MOESM65_ESM.mol]

  ChemDraw03051407452D

 22 24  0  0  0  0  0  0  0  0999 V2000
    0.2794    1.1284    0.0000 C   0  0  0  0  0  0  0  0  0  0  0  0
    0.9939    1.5409    0.0000 C   0  0  0  0  0  0  0  0  0  0  0  0
    0.9939    2.3631    0.0000 O   0  0  0  0  0  0  0  0  0  0  0  0
    1.7060    1.1298    0.0000 O   0  0  0  0  0  0  0  0  0  0  0  0
    1.7060    0.3076    0.0000 C   0  0  0  0  0  0  0  0  0  0  0  0
    2.4181   -0.1035    0.0000 C   0  0  0  0  0  0  0  0  0  0  0  0
   -0.3040    1.7117    0.0000 C   0  0  0  0  0  0  0  0  0  0  0  0
   -1.0771    1.7144    0.0000 C   0  0  0  0  0  0  0  0  0  0  0  0
   -1.8457    1.3032    0.0000 C   0  0  0  0  0  0  0  0  0  0  0  0
   -1.7073    0.4538    0.0000 C   0  0  0  0  0  0  0  0  0  0  0  0
   -0.5455    1.1284    0.0000 C   0  0  0  0  0  0  0  0  0  0  0  0
    0.1884   -2.4288    0.0000 C   0  0  0  0  0  0  0  0  0  0  0  0
    0.1884   -1.4987    0.0000 C   0  0  0  0  0  0  0  0  0  0  0  0
    0.9939   -1.0336    0.0000 C   0  0  0  0  0  0  0  0  0  0  0  0
    0.9939   -0.1035    0.0000 C   0  0  0  0  0  0  0  0  0  0  0  0
    0.4922    0.3342    0.0000 C   0  0  0  0  0  0  0  0  0  0  0  0
   -1.0488   -0.0771    0.0000 C   0  0  0  0  0  0  0  0  0  0  0  0
   -0.8072    0.5063    0.0000 C   0  0  0  0  0  0  0  0  0  0  0  0
   -0.2239   -0.0770    0.0000 C   0  0  0  0  0  0  0  0  0  0  0  0
   -2.4181    0.0404    0.0000 H   0  0  0  0  0  0  0  0  0  0  0  0
   -1.4896    2.4288    0.0000 H   0  0  0  0  0  0  0  0  0  0  0  0
   -0.0103   -0.8739    0.0000 H   0  0  0  0  0  0  0  0  0  0  0  0
  1  2  1  0      
  2  3  2  0      
  2  4  1  0      
  4  5  1  0      
  5 15  1  0      
  5  6  2  0      
  1  7  1  0      
  7  8  1  0      
  8  9  1  0      
  9 10  1  0      
  1 11  1  1      
 12 13  1  0      
 13 14  1  0      
 14 15  1  0      
  1 16  1  0      
 10 17  1  0      
  8 18  1  6      
 10 11  1  1      
 19 18  1  6      
 16 19  1  0      
 17 19  1  0      
 10 20  1  0      
  8 21  1  0      
 19 22  1  0      
M  END
