# Supplementary material for: A general ligand design for gold catalysis allowing ligand-directed anti-nucleophilic attack of alkynes
Source: Springer Nature journal article supplement (doi:10.1038/ncomms4470), 2014-04-07
Supplement: 41467_2014_BFncomms4470_MOESM69_ESM.mol [file 41467_2014_BFncomms4470_MOESM69_ESM.mol]

  ChemDraw03051407452D

 19 18  0  0  0  0  0  0  0  0999 V2000
    2.5006    0.8817    0.0000 C   0  0  0  0  0  0  0  0  0  0  0  0
    2.5006    0.0538    0.0000 C   0  0  0  0  0  0  0  0  0  0  0  0
    1.7862   -0.3587    0.0000 O   0  0  0  0  0  0  0  0  0  0  0  0
    3.2151   -0.3587    0.0000 O   0  0  0  0  0  0  0  0  0  0  0  0
    3.2151   -1.1837    0.0000 C   0  0  0  0  0  0  0  0  0  0  0  0
    3.9296   -1.5962    0.0000 C   0  0  0  0  0  0  0  0  0  0  0  0
   -3.9296   -1.1837    0.0000 C   0  0  0  0  0  0  0  0  0  0  0  0
   -3.2151   -1.5962    0.0000 C   0  0  0  0  0  0  0  0  0  0  0  0
   -2.5006   -1.1837    0.0000 C   0  0  0  0  0  0  0  0  0  0  0  0
   -1.7862   -1.5962    0.0000 C   0  0  0  0  0  0  0  0  0  0  0  0
   -1.0717   -1.1837    0.0000 C   0  0  0  0  0  0  0  0  0  0  0  0
   -0.3572   -1.5962    0.0000 C   0  0  0  0  0  0  0  0  0  0  0  0
    0.3572   -1.1837    0.0000 C   0  0  0  0  0  0  0  0  0  0  0  0
    1.0717   -1.5962    0.0000 C   0  0  0  0  0  0  0  0  0  0  0  0
    1.7862   -1.1837    0.0000 C   0  0  0  0  0  0  0  0  0  0  0  0
    2.5006   -1.5962    0.0000 C   0  0  0  0  0  0  0  0  0  0  0  0
    3.2151    1.2942    0.0000 F   0  0  0  0  0  0  0  0  0  0  0  0
    2.0882    1.5962    0.0000 F   0  0  0  0  0  0  0  0  0  0  0  0
    1.6756    0.8817    0.0000 F   0  0  0  0  0  0  0  0  0  0  0  0
  1  2  1  0      
  2  3  2  0      
  2  4  1  0      
  4  5  1  0      
  5 16  1  0      
  5  6  2  0      
 15 16  1  0      
 14 15  1  0      
 13 14  1  0      
 12 13  1  0      
 11 12  1  0      
 10 11  1  0      
  9 10  1  0      
  8  9  1  0      
  7  8  1  0      
  1 17  1  0      
  1 18  1  0      
  1 19  1  0      
M  END
