# Supplementary material for: A general ligand design for gold catalysis allowing ligand-directed anti-nucleophilic attack of alkynes
Source: Springer Nature journal article supplement (doi:10.1038/ncomms4470), 2014-04-07
Supplement: 41467_2014_BFncomms4470_MOESM89_ESM.mol [file 41467_2014_BFncomms4470_MOESM89_ESM.mol]

  ChemDraw03051407452D

 14 14  0  0  0  0  0  0  0  0999 V2000
   -1.0770   -0.0035    0.0000 C   0  0  0  0  0  0  0  0  0  0  0  0
   -0.3625    0.4090    0.0000 C   0  0  0  0  0  0  0  0  0  0  0  0
    0.3520   -0.0035    0.0000 O   0  0  0  0  0  0  0  0  0  0  0  0
   -0.3625    1.2340    0.0000 O   0  0  0  0  0  0  0  0  0  0  0  0
    1.0664    0.4090    0.0000 C   0  0  0  0  0  0  0  0  0  0  0  0
    1.7809   -0.0035    0.0000 C   0  0  0  0  0  0  0  0  0  0  0  0
    1.0664    1.2340    0.0000 C   0  0  0  0  0  0  0  0  0  0  0  0
    1.7809   -0.8314    0.0000 C   0  0  0  0  0  0  0  0  0  0  0  0
    2.4979    0.4105    0.0000 C   0  0  0  0  0  0  0  0  0  0  0  0
   -1.7874    0.4067    0.0000 C   0  0  0  0  0  0  0  0  0  0  0  0
   -2.4979   -0.0035    0.0000 C   0  0  0  0  0  0  0  0  0  0  0  0
   -2.4979   -0.8238    0.0000 C   0  0  0  0  0  0  0  0  0  0  0  0
   -1.7874   -1.2340    0.0000 C   0  0  0  0  0  0  0  0  0  0  0  0
   -1.0770   -0.8238    0.0000 C   0  0  0  0  0  0  0  0  0  0  0  0
  1  2  1  0      
  2  3  1  0      
  2  4  2  0      
  3  5  1  0      
  5  6  1  0      
  5  7  2  0      
  6  8  1  0      
  9  6  2  0      
  1 10  2  0      
 10 11  1  0      
 11 12  2  0      
 12 13  1  0      
 13 14  2  0      
 14  1  1  0      
M  END
